# Supplementary material
Source: publisher figshare collection journal article supplement (https://gsapubs.figshare.com/ndownloader/files/22899740)
Supplement: Supplementary file 1 [file 22899740]

## Sheet: Table A1
Sample Name	Sample Number	Location Code	Batch Number	Specimen Type	Ca (ppm)	Fe (ppm)	Mg (ppm)	Mn (ppm)	Sr (ppm)	87Sr/86Sr	2 SEM	Age (Ma)	Error (Ma)
RZ3_S13_06B	175	1	3	Inoceramid	154403	395.416	1145.55	222.434	507.536	0.707572	8.0118e-06	77.65	0.15
RZ3_S13_07E	182	1	3	Inoceramid	148968	545.411	948.856	337.694	430.182	0.707566	7.62956e-06	77.9	0.15
RZ3_S13_03	181	1	3	Inoceramid	168267	219.35	902.605	179.874	581.571	0.707534	1.17911e-05	79.05	0.15
RZ3_S13_05A	160	1	3	Inoceramid	166502	165.024	1181.64	164.453	597.819	0.707532	1.01774e-05	79.15	0.15
RZ3_S13_02A	152	1	3	Inoceramid	147166	317.285	759.619	244.388	526.461	0.70753	8.25083e-06	79.25	0.15
RZ3_S13_01	155	1	3	Gastropod	177772	175.788	361.568	406.396	824.403	0.707422	7.00974e-06	86.3	0.2
RZ3_S13_07C	177	1	3	Oyster	188966	207.608	378.31	562.745	788.091	0.707378	8.84476e-06	87.85	0.15
CM_TP_RZ102_005	52	1	1	Bivalve	-	-	-	-	-	0.70737	8.32078e-06	88.05	0.2
CM_TP_RZ102_001	44	1	1	Bivalve	-	-	-	-	-	0.707309	6.98479e-06	-	-
CM_TP_RZ102_003	50	1	1	Bivalve	-	-	-	-	-	0.707106	6.91032e-06	-	-
CM_TP_RZ102_005	51	1	1	Bivalve	-	-	-	-	-	0.706983	6.68819e-06	-	-
RZ103_036	76	1	2	Cephalopod	-	-	-	-	-	0.7058	5.82881e-06	-	-
RZ103_034	83	1	2	Bivalve	-	-	-	-	-	0.705859	6.68561e-06	-	-
RZ103_037	93	1	2	Gastropod	114433	2192.01	995.804	1796.76	190.156	0.707107	5.9873e-06	-	-
RZ103_001	97	1	2	Gastropod	124839	2617.18	1268.38	1613.89	214.357	0.707204	7.24366e-06	-	-
RZ3_S13_14A	121	1	3	Bivalve	73235.6	2697.27	724.121	727.639	138.833	-	-	-	-
RZ_S13_08	140	1	3	Bivalve	93672.9	2294.29	1194.21	1300.89	150.751	-	-	-	-
RZ3_S13_11	142	1	3	Cephalopod	175505	679.513	290.036	1905.28	267.081	-	-	-	-
RZ3_S13_04	143	1	3	Gastropod	-	-	-	-	-	-	-	-	-
RZ3_S13_13	144	1	3	Bivalve	104854	1942.52	714.299	1185.68	237.211	-	-	-	-
RZ3_S13_12	145	1	3	Oyster	64372.8	2482.89	1314.56	798.526	82.8327	-	-	-	-
RZ3_S13_10	146	1	3	Bivalve	73333	2127.01	634.207	872.094	146.458	-	-	-	-
RZ3_S13_02B	153	1	3	Inoceramid	-	-	-	-	-	-	-	-	-
RZ3_S13_02C	154	1	3	Gastropod	-	-	-	-	-	-	-	-	-
RZ3_S13_17A	157	1	3	Oyster	59085.8	1416.7	605.458	984.095	90.4237	-	-	-	-
RZ3_S13_17B	158	1	3	Gastropod	-	-	-	-	-	-	-	-	-
RZ3_S13_17C	159	1	3	Gastropod	-	-	-	-	-	-	-	-	-
RZ3_S13_05B	161	1	3	Brachiopod	-	-	-	-	-	-	-	-	-
RZ3_S13_05C	162	1	3	Inoceramid	-	-	-	-	-	-	-	-	-
RZ3_S13_05D	163	1	3	Inoceramid	-	-	-	-	-	-	-	-	-
RZ3_S13_06A	174	1	3	Bivalve	69204.3	1702.8	915.903	1069	151.762	-	-	-	-
RZ3_S13_06C	176	1	3	Gastropod	101869	2255.24	1328.55	1063.22	285.679	-	-	-	-
RZ3_S13_07C	178	1	3	Oyster	188966	207.608	378.31	562.745	788.091	-	-	-	-
RZ3_S13_07D	179	1	3	Inoceramid	150287	389.335	468.671	936.865	372.172	-	-	-	-
RZ3_S13_16	180	1	3	Oyster	115603	2501.02	788.498	750.469	290.981	-	-	-	-
RZ4up_024	77	2	2	Oyster	182457	426.7	219.742	170.814	564.639	0.707538	6.65111e-06	78.9	0.15
RZ4up_30	185	2	3	Oyster	185623	590.679	380.382	432.695	514.164	0.707517	7.74726e-06	79.9	0.25
CM_TP_RZ4up_017	40	2	1	Inoceramid	195342	387.075	324.091	121.283	580.803	0.707512	9.67989e-06	80.25	0.25
CM_TP_RZ4up_022	35	2	1	Oyster	-	-	-	-	-	0.707511	6.64136e-06	80.3	0.25
Cag_InSit_01B	148	2	3	Inoceramid	175984	280.756	1086.21	191.515	617.169	0.707511	7.78386e-06	80.3	0.25
CM_TP_RZ4up_025	36	2	1	Oyster	196758	139.552	243.431	108.921	529.29	0.707506	1.01513e-05	80.65	0.25
RZ4up_23	186	2	3	Oyster	176098	567.296	659.241	524.134	417.04	0.707501	9.49246e-06	80.95	0.25
CM_TP_MCC22_004	25	2	1	Inoceramid	182802	197.656	778.266	419.361	530.98	0.707499	7.30421e-06	81.1	0.2
CM_TP_MCC22_006	32	2	1	Inoceramid	-	-	-	-	-	0.707494	7.41531e-06	81.45	0.25
CM_TP_MCC22_005	23	2	1	Inoceramid	195807	92.6887	743.003	144.542	566.202	0.707482	8.12089e-06	82.3	0.2
Cag_InSit_01A	147	2	3	Inoceramid	155798	510.856	889.691	435.279	521.516	0.70747	9.22154e-06	83.15	0.25
CM_TP_MCC22_001	27	2	1	Inoceramid	189841	261.63	1009.21	271.865	548.323	0.707469	7.93503e-06	83.25	0.25
CM_TP_MCC22_007	8	2	1	Inoceramid	188753	159.678	748.256	234.685	573.271	0.707463	8.33085e-06	83.65	0.3
CM_TP_MCC22_002	4	2	1	Inoceramid	189976	744.845	710.099	266.418	591.924	0.707449	8.6887e-06	84.65	0.25
CM_TP_MCC22_008	26	2	1	Inoceramid	190946	130.434	650.253	208.733	487.714	0.707449	6.8208e-06	84.65	0.25
CM_TP_RZ4up_029	39	2	1	Oyster	186305	595.69	629.704	382.358	447.72	0.707442	7.41227e-06	85.15	0.25
RZ4up_026	87	2	2	Oyster	175244	672.962	744.75	199.144	458.655	0.707439	6.23338e-06	85.35	0.25
CM_TP_MCC22_009	31	2	1	Inoceramid	183744	406.075	765.908	456.322	499.99	0.707403	8.2888e-06	87.05	0.15
RZ4n_07	117	2	3	Oyster	174066	5878.02	1495.49	1837.14	896.534	-	-	-	-
RZ4n_02A	122	2	3	Oyster	179157	5484.06	1382.36	2179.45	838.47	-	-	-	-
RZ4n_02B	123	2	3	Gastropod	90948.8	5121.36	1769.71	971.318	292.146	-	-	-	-
RZ4n_02C	124	2	3	Bivalve	170843	5219.65	1348.07	2664.9	888.586	0.705962	8.38739e-06	-	-
RZ4n_02C	125	2	3	Bivalve	170843	5219.65	1348.07	2664.9	888.586	-	-	-	-
RZ4n_01A	126	2	3	Cephalopod	105362	4482.74	2128.49	1219.98	455.398	-	-	-	-
RZ4n_01B	127	2	3	Bivalve	166182	4683.43	1378.64	2559.76	1010.27	0.706197	9.04208e-06	-	-
RZ4n_01B	128	2	3	Bivalve	166182	4683.43	1378.64	2559.76	1010.27	-	-	-	-
RZ4n_01C	129	2	3	Oyster	184732	2536.33	1334.62	719.404	1451.25	0.706869	8.20507e-06	-	-
RZ4n_01C	130	2	3	Oyster	184732	2536.33	1334.62	719.404	1451.25	-	-	-	-
RZ4n_01D	131	2	3	Gastropod	-	-	-	-	-	-	-	-	-
RZ4n_01E	132	2	3	Gastropod	-	-	-	-	-	-	-	-	-
RZ4n_01F	133	2	3	Gastropod	-	-	-	-	-	-	-	-	-
RZ4n_01G	134	2	3	Oyster	177739	6810.06	2244.04	2137.26	797.964	-	-	-	-
RZ4n_09	135	2	3	Oyster	190003	2088.25	1697.89	785.571	993.329	0.706735	8.38993e-06	-	-
RZ4n_09	136	2	3	Oyster	190003	2088.25	1697.89	785.571	993.329	-	-	-	-
RZ4n_03	156	2	3	Oyster	170025	5712.68	1557.81	1997.18	898.833	-	-	-	-
RZ4n_04A	165	2	3	Oyster	-	-	-	-	-	-	-	-	-
RZ4n_04B	166	2	3	Oyster	172879	5068.62	2359.13	1038.61	715.278	-	-	-	-
RZ4n_06A	167	2	3	Oyster	172371	3863.32	1710.33	1357.52	931.401	0.706791	1.13657e-05	-	-
RZ4n_06A	168	2	3	Oyster	172371	3863.32	1710.33	1357.52	931.401	-	-	-	-
RZ4n_06B	169	2	3	Gastropod	88626.5	3957.7	1528.3	1330.11	175.921	-	-	-	-
RZ4n_07A	170	2	3	Inoceramid	-	-	-	-	-	-	-	-	-
RZ4n_07B	171	2	3	Gastropod	-	-	-	-	-	-	-	-	-
RZ4n_05A	172	2	3	Oyster	172890	7048.46	1982.98	2376.71	863.677	-	-	-	-
RZ4n_05B	173	2	3	Gastropod	-	-	-	-	-	-	-	-	-
RZ4up_23	187	2	3	Oyster	176098	567.296	659.241	524.134	417.04	-	-	-	-
MCC111_29	190	2	3	Oyster	152887	992.659	508.755	179.678	417.631	-	-	-	-
TSC_52B	201	3	3	Oyster	173307	340.396	309.65	134.788	551.526	0.70753	1.87972e-05	79.25	0.15
TSC_52A	200	3	3	Oyster	184369	289.236	252.213	88.7028	525.459	0.707518	9.21841e-06	79.85	0.25
TSC_059A	61	3	2	Oyster	182828	418.727	179.386	172.06	529.963	0.707519	7.92084e-06	80.1	0.3
TSC_066	89	3	2	Oyster	170563	585.446	343.011	399.908	509.392	0.70751	7.42691e-06	80.4	0.25
TSC_70	195	3	3	Oyster	185408	256.929	231.083	128.178	480.478	0.70751	1.3101e-05	80.4	0.25
TSC_60	198	3	3	Oyster	188291	138.056	228.596	130.025	481.667	0.707501	9.23163e-06	80.95	0.25
TSC_064	67	3	2	Oyster	181507	741.019	567.286	185.11	486.3	0.70746	8.09233e-06	83.85	0.3
TSC_059B	62	3	2	Oyster	156124	1462.18	202.291	1472.16	339.64	0.706225	7.45394e-06	-	-
TSC_029	63	3	2	Oyster	152935	3465.74	1237.23	3223.96	367.327	0.706359	7.32709e-06	-	-
TSC_065	64	3	2	Oyster	169211	1506.55	420.154	704.666	454.62	0.707127	8.39305e-06	-	-
TSC_034	65	3	2	Oyster	164470	3326.13	1220.28	3295.82	370.345	0.706122	7.48713e-06	-	-
TSC_020	91	3	2	Cephalopod	160200	3283.86	956.211	2770.95	359.302	0.706198	7.76323e-06	-	-
TSC_14A	196	3	3	Oyster	113881	2633.64	750.029	1787.39	207.434	-	-	-	-
TSC_14B	197	3	3	Inoceramid	-	-	-	-	-	-	-	-	-
TSC_33	199	3	3	Oyster	124524	2901.64	1037.03	1984.63	290.907	-	-	-	-
CM_TP_MCC111_034	38	4	1	Oyster	191903	342.203	317.343	61.2026	527.025	0.707527	8.71335e-06	79.35	0.2
MCC111_27	188	4	3	Inoceramid	182891	308.611	700.445	149.116	565.802	0.707521	9.25909e-06	79.65	0.25
MCC111_020	80	4	2	Inoceramid	176126	183.671	961.507	66.3175	572.925	0.707519	6.78753e-06	79.8	0.7
CM_TP_MCC111_005	55	4	1	Oyster	-	-	-	-	-	0.707516	7.19861e-06	80	0.25
CM_TP_MCC111_007	56	4	1	Oyster	-	-	-	-	-	0.707516	6.4742e-06	80	0.25
CM_TP_MCC111_035	53	4	1	Oyster	195550	302.718	205.665	50.0358	568.372	0.707514	9.03051e-06	80.1	0.3
CM_TP_MCC111_026	49	4	1	Inoceramid	191503	142.819	782.304	88.8057	543.954	0.70751	6.22085e-06	80.4	0.25
CM_TP_MCC111_013	54	4	1	Inoceramid	197482	263.969	855.442	96.1621	563.14	0.707508	6.46903e-06	80.5	0.25
MCC111_29	189	4	3	Oyster	152887	992.659	508.755	179.678	417.631	0.707503	1.10212e-05	80.85	0.25
MCC111_30	192	4	3	Oyster	184181	392.551	446.82	332.283	578.02	0.707501	1.10725e-05	80.95	0.25
GCh-1.2	59	4	1	Oyster	198613	366.328	264.506	178.211	476.15	0.707496	8.10491e-06	81.3	0.25
MCC111_33A	193	4	3	Oyster	185310	403.624	1798.18	109.543	553.71	0.707494	9.2425e-06	81.45	0.25
CM_TP_MCC111_001	37	4	1	Bivalve	191828	124.906	695.862	44.204	534.287	0.707488	7.54197e-06	81.9	0.25
BigO_01A	118	4	3	Inoceramid	165107	373.542	1196.15	131.149	663.936	0.707486	7.3891e-06	82.05	0.2
MCC111_009	92	4	2	Oyster	-	-	-	-	-	0.707485	7.19412e-06	82.1	0.2
BigO_01B	119	4	3	Inoceramid	132359	837.148	1258.01	261.157	477.011	0.707485	5.31805e-06	82.1	0.2
MCC111_031A	78	4	2	Inoceramid	-	-	-	-	-	0.707392	7.27319e-06	87.4	0.15
MCC111_031B	79	4	2	Oyster	115492	4561.56	1380.23	1573.37	375.164	0.707095	7.1399e-06	-	-
BigO_01B	120	4	3	Inoceramid	132359	837.148	1258.01	261.157	477.011	-	-	-	-
BigO_02	137	4	3	Gastropod	-	-	-	-	-	-	-	-	-
MCC111_36	191	4	3	Oyster	168717	2069.31	694.782	634.535	500.052	-	-	-	-
MCC111_33B	194	4	3	Inoceramid	-	-	-	-	-	-	-	-	-
AR_TP_Fgr_001	41	5	1	Inoceramid	-	-	-	-	-	0.707521	5.48935e-06	79.65	0.25
AR_TP_Fgr_002	15	5	1	Inoceramid	191422	44.0569	544.305	38.3681	493.632	0.707504	1.01452e-05	80.75	0.25
CSF1_01A	101	6	3	Inoceramid	181327	63.9803	720.279	49.7731	469.507	0.707548	8.40795e-06	78.5	0.15
CSF1_05	99	6	3	Oyster	184207	490.238	234.437	81.1659	661.822	0.707538	8.11097e-06	78.9	0.15
CSF1_12	205	6	3	Inoceramid	181127	217.174	1010.69	159.692	648.477	0.707528	9.25411e-06	79.35	0.2
CSF1_10	203	6	3	Inoceramid	183015	364.116	1154.19	133.316	602.445	0.707516	4.8389e-06	80	0.25
CSF1_03	100	6	3	Inoceramid	170186	352.794	786.666	146.91	514.186	0.707442	9.44093e-06	85.15	0.25
CSF2_03	107	6	3	Inoceramid	184079	147.61	644.374	186.394	480.374	0.707442	8.35861e-06	85.15	0.25
CSF2_02	106	6	3	Inoceramid	183376	156.407	612.224	253.96	517.333	0.707426	7.06427e-06	86.15	0.2
CSF2_01	105	6	3	Inoceramid	173462	323.145	898.546	298.691	439.425	0.707368	7.21906e-06	88.1	0.2
CSF1_08	98	6	3	Inoceramid	86848.8	3237.33	1588.01	469.36	258.443	-	-	-	-
CSF1_01B	102	6	3	Inoceramid	129455	2226.21	1439.5	360.804	402.87	-	-	-	-
CSF1_04	103	6	3	Inoceramid	128339	1510.33	1046.71	413.995	360.174	-	-	-	-
CSF1_07	104	6	3	Inoceramid	-	-	-	-	-	-	-	-	-
CSF1_09	202	6	3	Bivalve	138819	4988.04	1393.84	1323.61	236.101	-	-	-	-
CSF1_11	204	6	3	Inoceramid	-	-	-	-	-	-	-	-	-
CSF1_13	206	6	3	Gastropod	-	-	-	-	-	-	-	-	-
Lwr8_04	111	7	3	Inoceramid	183485	39.4929	639.136	18.7925	507.97	0.707531	8.74278e-06	79.2	0.15
Lwr8_05	112	7	3	Inoceramid	187159	16.1141	635.792	28.1282	559.131	0.707481	7.03116e-06	82.4	0.2
Lwr8_09	116	7	3	Inoceramid	186660	28.8107	657.973	70.6913	594.818	0.707468	8.28528e-06	83.3	0.3
Lwr8_06	113	7	3	Inoceramid	181046	35.3054	597.813	39.2071	530.057	0.707452	9.82256e-06	84.45	0.3
Fig_Lwr8_01	108	7	3	Inoceramid	186664	24.445	685.414	29.7923	559.179	0.707391	9.05058e-06	87.45	0.15
Lwr8_02	109	7	3	Inoceramid	184583	43.489	458.924	51.2141	416.675	-	-	-	-
Lwr8_03	110	7	3	Inoceramid	184679	24.7706	403.952	74.1214	400.617	-	-	-	-
Lwr8_07	114	7	3	Inoceramid	182028	113.385	651.555	86.4473	543.902	-	-	-	-
Lwr8_08	115	7	3	Inoceramid	112297	225.451	557.114	77.686	354.769	-	-	-	-
CAZ_TP_OV_002A	34	8	1	Oyster	194931	354.518	377.936	133.53	743.637	0.707527	8.05431e-06	79.4	0.2
CAZ_TP_OV_001	42	8	1	Gastropod	-	-	-	-	-	0.707471	6.88923e-06	83.1	0.25
CAZ_TP_OV_004A	19	8	1	Oyster	193186	226.286	565.81	95.019	574.476	0.707451	7.16957e-06	84.5	0.25
CAZ_003A	74	9	2	Oyster	187793	132.545	247.436	29.4223	571.467	0.70754	7.15662e-06	78.85	0.15
CAZ_DT_Puma_004	2	9	1	Oyster	191555	263.839	237.876	54.2431	545.305	0.70751	8.35979e-06	80.4	0.25
CAZ_DT_LD_001	6	9	1	Oyster	190741	118.232	414.961	220.011	406.256	0.707375	5.41262e-06	87.9	0.2
CAZ_DT_LD_005	18	9	1	Oyster	187135	1053.7	396.31	1078.49	338.792	0.705979	7.73423e-06	-	-
CAZ_DT_Puma_003	20	9	1	Oyster	191701	206.712	65.5655	690.027	199.742	0.705471	9.50979e-06	-	-
CAZ_DT_Puma_002	21	9	1	Bivalve	-	-	-	-	-	0.705247	7.38294e-06	-	-
CAZ_DT_Puma_001A	22	9	1	Gastropod	-	-	-	-	-	0.705463	9.12249e-06	-	-
CAZ_DT_LD_002	45	9	1	Inoceramid	192910	1262.84	446.774	1066.64	348.577	0.705932	7.73949e-06	-	-
CAZ_DT_LD_003	57	9	1	Bivalve	188593	1291.26	450.892	1264.31	354.905	0.705996	8.99324e-06	-	-
PPC_TP_Puma_064	47	10	1	Oyster	200330	660.305	254.983	193.541	449.964	0.707528	8.7093e-06	79.35	0.2
PPC-1.1	60	10	1	Oyster	196746	318.295	392.946	88.9027	417.129	0.70749	6.33556e-06	81.75	0.2
PPC_TP_Puma_060A	3	10	1	Oyster	195018	597.332	552.298	549.615	353.187	0.707374	6.35038e-06	87.95	0.15
PPC_058A	71	10	2	Oyster	186680	291.516	522.033	333.702	390.434	0.707368	7.41286e-06	88.15	0.2
PPC_TP_Puma_004	9	10	1	Gastropod	3540.24	5628.96	2391.02	302.299	8.68753	0.706887	1.68748e-05	-	-
PPC_TP_Puma_012	43	10	1	Gastropod	-	-	-	-	-	0.705761	9.27117e-06	-	-
PPC_002	66	10	2	Oyster	179600	638.177	747.543	330.7	344.96	0.707285	1.0874e-05	-	-
PPC_027A	81	10	2	Bivalve	96515.6	3541.98	1501.59	970.834	149.853	0.705871	6.88261e-06	-	-
PPC_027B	82	10	2	Oyster	144924	5404.74	2509.1	1743.23	302.211	0.706247	7.48045e-06	-	-
PPC_041A	84	10	2	Bivalve	-	-	-	-	-	0.706019	7.32629e-06	-	-
PPC_041B	85	10	2	Gastropod	-	-	-	-	-	0.707519	7.92084e-06	-	-
PPC_030A	88	10	2	Inoceramid	100047	3129.08	1300.82	984.944	137.227	0.7058	5.82881e-06	-	-
PPC_040	94	10	2	Gastropod	-	-	-	-	-	0.707519	6.78753e-06	-	-
PPC_019	95	10	2	Bivalve	100257	2631.18	1023.34	978.62	132.331	0.705859	6.68561e-06	-	-
PPC_056	96	10	2	Gastropod	119696	2869.19	1233.07	1145.09	142.607	0.706019	7.32629e-06	-	-
Puma_LS_01	139	10	3	Oyster	192815	261.957	291.868	291.677	443.136	-	-	-	-
Puma_LS_02	141	10	3	Oyster	195427	244.016	229.158	256.112	455.078	-	-	-	-
Puma_LS_05	149	10	3	Oyster	177657	575.309	279.125	310.954	454.662	-	-	-	-
PPC_Ch4Lag	150	10	3	Oyster	177305	1047.34	826.062	536.959	342.446	0.706966	9.52353e-06	-	-
PPC_Ch4Lag	151	10	3	Oyster	177305	1047.34	826.062	536.959	342.446	-	-	-	-
Puma_LS_04	164	10	3	Inoceramid	-	-	-	-	-	-	-	-	-
PPC_Puma_31	184	10	3	Bivalve	162073	2871.27	1227.19	5577.26	90.0447	-	-	-	-
PPC_26	207	10	3	Oyster	154622	2813.33	1254.26	2310.35	324.333	-	-	-	-
PSS_001	90	11	2	Oyster	185610	255.088	494.017	41.0719	418.126	0.707517	7.28427e-06	79.9	0.25
PSS_TP_Puma_002	46	11	1	Oyster	-	-	-	-	-	0.707516	7.38902e-06	80	0.25
PSS_003	86	11	2	Oyster	186308	258.111	241.913	70.8673	453.454	0.707508	8.37187e-06	80.5	0.25
PSS_TP_Puma_007	48	11	1	Oyster	197069	115.109	515.086	86.6506	425.017	0.707502	8.37924e-06	80.9	0.25
PSS_010	73	11	2	Oyster	177638	237.877	359.522	94.0869	432.046	0.707499	7.7928e-06	81.15	0.25
PSS_013	72	11	2	Inoceramid	182792	224.584	488.147	210.173	387.461	0.70748	8.45645e-06	82.45	0.2
PSS_008A	69	11	2	Oyster	179927	421.276	402.338	170.057	399.729	0.707418	7.88624e-06	86.5	0.15
PSS_011	75	11	2	Oyster	186177	81.9428	510.411	63.6692	470.594	0.707415	5.54691e-06	86.6	0.15
PSS_005	70	11	2	Oyster	185978	216.762	263.721	159.679	485.112	0.707406	7.78686e-06	86.95	0.15
PSS_TP_Puma_004	5	11	1	Oyster	187383	197.502	265.152	528.106	424.625	0.707395	8.03079e-06	87.3	0.15
PSS_TP_Puma_006	7	11	1	Oyster	188468	246.848	245.798	188.379	380.191	0.707379	7.0041e-06	87.8	0.15
PSS_12	208	11	3	Oyster	189942	598.111	399.344	954.101	446.702	-	-	-	-
Puma_LS_03	138	12	3	Oyster	188871	523.732	511.742	158.813	412.02	0.707362	7.96023e-06	88.35	0.2
RTPV_DT_LD_005	14	13	1	Oyster	195745	38.0806	289.596	43.9318	461.116	0.707752	6.75196e-06	71.35	0.2
RTPV_DT_LD_009	30	13	1	Oyster	195961	46.5265	250.513	118.152	473.561	0.707744	8.91419e-06	71.65	0.25
RTPV_DT_LD_001	58	13	1	Oyster	200192	24.7842	415.743	53.6847	436.373	0.707745	8.60819e-06	71.65	0.15
RTPV_DT_LD_003	11	13	1	Oyster	195171	93.9014	314.475	214.637	404.531	0.707732	7.07082e-06	72.3	0.2
RTPV_DT_LD_006	29	13	1	Oyster	194753	26.4703	317.587	56.8207	429.963	0.707719	7.48642e-06	72.85	0.1
RTPV_DT_LD_010	24	13	1	Bivalve	193270	44.299	420.821	127.017	392.659	0.707673	9.25315e-06	74.05	0.15
RTPV_DT_LD_008	28	13	1	Oyster	197739	26.5568	222.978	76.5764	397.445	0.707663	6.78046e-06	74.35	0.15
RTPV_DT_LD_002	1	13	1	Oyster	129523	912.288	404.395	952.965	188.844	0.707663	8.81708e-06	-	-
RTPV_010	68	13	2	Bivalve	3112.3	3484.85	1468.14	101.832	18.5938	0.706426	6.70836e-06	-	-
PV_TP-DT_LD_012	10	14	1	Bivalve	126500	2423.24	795.376	1218.04	179.647	0.706402	1.02689e-05	-	-
PV_TP-DT_LD_030	12	14	1	Inoceramid	1769.49	1609.2	733.198	600.858	9.76394	0.706737	2.0253e-05	-	-
PV_TP-DT_LD_029	13	14	1	Gastropod	176107	2146.13	677.281	2377.7	328.154	0.705864	6.42508e-06	-	-
PV_TP-DT_LD_035	16	14	1	Gastropod	164024	1440.27	996.592	2004.19	379.718	0.707081	7.5947e-06	-	-
PV_TP-DT_LD_023	17	14	1	Inoceramid	182410	1940.34	608.896	2360.27	335.863	0.705911	6.36043e-06	-	-
PV_TP-DT_LD_007	33	14	1	Inoceramid	146587	5495.52	1390.52	1850.57	186.569	0.706318	7.40902e-06	-	-
PV_08	183	14	3	Oyster	109839	7616.6	2042.79	1571.72	132.846	-	-	-	-

## Sheet: Table A2
Location Code Key
Location Code	Location	Stratiigraphic Interval	Depositional Context	Basin Phase
1	Cagual	Rio Zamora	MTD-Perched Fan	1
2	Cagual	RZ4 upper/below BigO	Slope Channels/Channel Levees (?)	2
3	Cagual	BigO/Glogy	Slope Channels	2
4	Contreras	Unit D	Slope Channel (?)	2
5	Solitario	Figueroa	Slope Channels	2
6	Alvarez	Figueroa	Slope Channels	2
7	Hotel Tres Pasos	Figueroa	Slope Channels	2
8	Cazador	Oveja	Upper Slope/Shelf (?)	3
9	Cazador	Puma	Upper slope/Shelf (?)	4
10	PPC	Puma	Slope Channels	4
11	south of PPC	Puma	Slope Channels	4
12	Sierra Dorotea	Puma (?)	Slope Channels	4
13	Rio Tres Pasos	Dorotea Fm	Shelf - shoreface	Dt
14	Pionero Vista	Dorotea Fm	Shelf - shoreface	Dt

## Sheet: G47594
Auchter, N.C., et al., 2020, Intrabasinal sediment recycling from detrital strontium isotope stratigraphy: Geology, v. 48, https://doi.org/10.1130/G47594.1
